# Supplementary material
Source: MDPI journal article supplement (https://www.mdpi.com/2072-4292/11/7/822)
Supplement: s1 [file s1]

**Supplementary Table S1.** Description of image object levels, segmentation and classification methods.

| Level | Purpose                                                                                             | Segmentation                                                                                                                                                                                                                                                                                                                                                            | Classification                                                                                                                                                                                                                                                                                                                                                                                         |                                                                                                                                                                                                                         |
|-------|-----------------------------------------------------------------------------------------------------|-------------------------------------------------------------------------------------------------------------------------------------------------------------------------------------------------------------------------------------------------------------------------------------------------------------------------------------------------------------------------|--------------------------------------------------------------------------------------------------------------------------------------------------------------------------------------------------------------------------------------------------------------------------------------------------------------------------------------------------------------------------------------------------------|-------------------------------------------------------------------------------------------------------------------------------------------------------------------------------------------------------------------------|
|       |                                                                                                     |                                                                                                                                                                                                                                                                                                                                                                         | Criteria                                                                                                                                                                                                                                                                                                                                                                                               | eCognition Functions                                                                                                                                                                                                    |
| I     | Separate lake from lake shore                                                                       | <ul style="list-style-type: none"><li>• Multiresolution segmentation on red, green, blue, PC 1, and PC 2 on the whole image</li></ul>                                                                                                                                                                                                                                   | <ul style="list-style-type: none"><li>• Threshold on PC 2 to label image objects</li><li>• Size of image objects to remove misclassified small lake image objects in the shore area.</li><li>• Spatial relationship to lake and lake shore objects</li><li>• Merge image objects of same class</li></ul>                                                                                               | <ul style="list-style-type: none"><li>• Assign</li><li>• Merge</li><li>• Enclosed by</li></ul>                                                                                                                          |
| II    | Identify sub-regions of lake: Lake ice with shadow, lake ice without shadow, and vegetation in lake | <ul style="list-style-type: none"><li>• Chessboard segmentation of lake object class</li><li>• Multiresolution segmentation on red, green, blue, PC 1, and PC 2 to segment lake object class</li></ul>                                                                                                                                                                  | <ul style="list-style-type: none"><li>• Threshold on PC 2 to label image objects</li><li>• Size of image objects to remove misclassified lake ice types: Lake Ice with shadow and without shadow</li><li>• Spatial relationship of lake ice with shadow and lake ice without shadow</li><li>• Merge image objects of same class</li></ul>                                                              | <ul style="list-style-type: none"><li>• Assign</li><li>• Merge</li><li>• Enclosed by</li></ul>                                                                                                                          |
| III   | Identify dark and white ice within lake ice with shadow and without shadow                          | <ul style="list-style-type: none"><li>• Chessboard segmentation of sub-regions of lake ice</li><li>• Multiresolution segmentation on red, green, blue, PC 1, and PC 2 to segment sub-regions of lake ice</li></ul>                                                                                                                                                      | <ul style="list-style-type: none"><li>• Threshold on PC 1 to label image objects</li><li>• Merge image objects of same class</li></ul>                                                                                                                                                                                                                                                                 | <ul style="list-style-type: none"><li>• Assign</li><li>• Merge</li></ul>                                                                                                                                                |
| IV    | Identify bubble patches in different regions of lake ice classified in level III.                   | <ul style="list-style-type: none"><li>• Chessboard segmentation of dark and white lake ice image objects</li><li>• Multiresolution segmentation on red, green, blue, PC 1, and PC 2 to segment dark and bright lake ice objects</li><li>• Contrast split segmentation algorithm on PC 1 to split cluster of fused bubble patches into individual bubble patch</li></ul> | <ul style="list-style-type: none"><li>• Canny edge detection algorithm on PC 1 band to label bubble patch edge area</li><li>• Spatial relationship of image objects with bubble patch to remove misclassified bubble patch objects or re-classify any missing bubble patch objects.</li><li>• Opening morphological filter to shape bubble patch</li><li>• Merge image objects of same class</li></ul> | <ul style="list-style-type: none"><li>• Canny Edge Algorithm</li><li>• Assign</li><li>• Merge</li><li>• Enclosed by</li><li>• Relationship to neighbours: 'Border to'</li><li>• Morphological Filter: Opening</li></ul> |

Supplementary Table S2. Bubble patch classification error matrix for year 2011.

|                  |            | Ground Truth |            | Total | Commission Error |
|------------------|------------|--------------|------------|-------|------------------|
| n=122            |            | Bubbles      | No Bubbles |       |                  |
| Classification   | Bubbles    | 45           | 2          | 47    | 4.3%             |
|                  | No Bubbles | 4            | 71         | 75    | 5.3%             |
| Total            |            | 49           | 73         |       |                  |
| Omission Error   |            | 8.2%         | 2.7%       |       |                  |
| Overall Accuracy |            | 95.1%        |            |       |                  |

Supplementary Table S3. Bubble patch classification error matrix for year 2012.

|                  |            | Ground Truth |            | Total | Commission Error |
|------------------|------------|--------------|------------|-------|------------------|
| n=151            |            | Bubbles      | No Bubbles |       |                  |
| Classification   | Bubbles    | 51           | 2          | 53    | 3.8%             |
|                  | No Bubbles | 1            | 97         | 98    | 1.0%             |
| Total            |            | 52           | 99         |       |                  |
| Omission Error   |            | 1.9%         | 2.0%       |       |                  |
| Overall Accuracy |            | 98%          |            |       |                  |
